# Supplementary material for: Spider Plant (Cleome gynandra L.): An Emerging Weed in the Sweet Corn–Brassica Cropping System
Source: MDPI journal article supplement (doi:10.3390/agronomy13051430), 2023-05-22
Supplement: s1 [file s1]

## Supplementary Materials

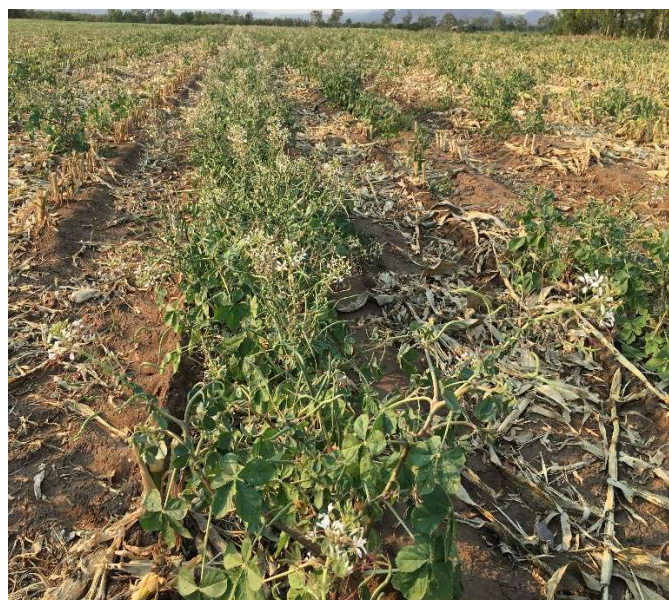

(a)

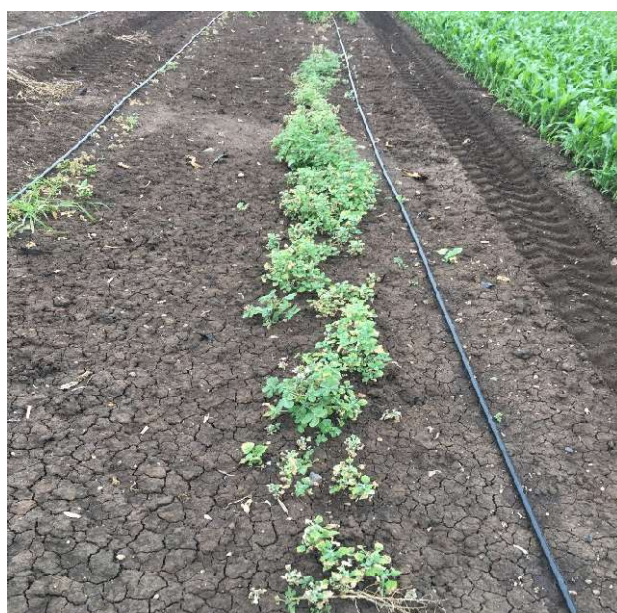

(b)

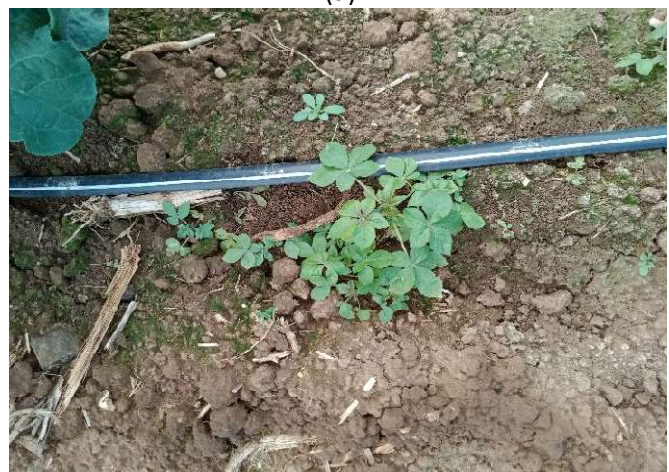

(c)

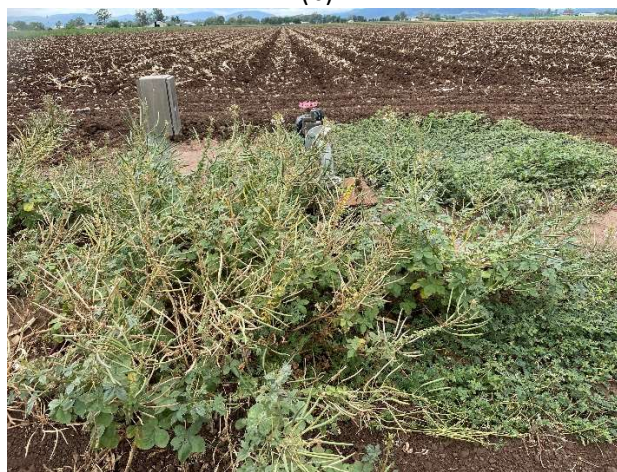

(d)

**Figure S1:** Images of field observations showing patches of spider plants germinated in areas with high soil moisture (**a, b**) patches of mature spider plants developed along the dripper lines in sweet corn crops (images taken after harvest); (**c**) young spider plants germinated under a dripper line in a cabbage crop; and (**d**) a small patch of mature plants close to the bore.
